# Supplementary material for: Multi-Objective Optimization of Electric Vehicle Charging Station Deployment Using Genetic Algorithms
Source: MDPI journal article supplement (doi:10.3390/app13084867), 2023-04-13
Supplement: s1 [file s1]

# Supplementary Material

Table S1 presents the dataset used for the core case study scenario development and analysis. This dataset includes the coordinates ( $x, y$ ) of each demand point and the number of EVs originating from it. The dataset includes 100 different demand points and 200 EVs in total.

**Table S1.** Dataset used for the case study development and analysis.

| Demand point No. | Demand coordinates |     | Number of EVs |
|------------------|--------------------|-----|---------------|
|                  | x                  | y   |               |
| 1                | 29                 | -24 | 3             |
| 2                | 25                 | 44  | 3             |
| 3                | 45                 | -27 | 2             |
| 4                | 15                 | -39 | 1             |
| 5                | 7                  | -49 | 3             |
| 6                | 32                 | -9  | 1             |
| 7                | -38                | -21 | 3             |
| 8                | -16                | -4  | 1             |
| 9                | -2                 | -40 | 1             |
| 10               | -7                 | -8  | 3             |
| 11               | 19                 | -4  | 3             |
| 12               | -42                | 37  | 3             |
| 13               | 16                 | -6  | 1             |
| 14               | 49                 | -28 | 1             |
| 15               | -15                | -43 | 2             |
| 16               | -42                | -30 | 2             |
| 17               | -45                | -2  | 2             |
| 18               | -35                | -1  | 3             |
| 19               | -2                 | 43  | 2             |
| 20               | -36                | -22 | 2             |
| 21               | -30                | 31  | 1             |
| 22               | 14                 | 44  | 2             |
| 23               | 41                 | -19 | 1             |
| 24               | 35                 | 26  | 1             |
| 25               | 42                 | 11  | 1             |
| 26               | -39                | 21  | 2             |
| 27               | 23                 | 10  | 2             |
| 28               | 46                 | 30  | 1             |
| 29               | 6                  | -39 | 2             |
| 30               | -2                 | -50 | 1             |
| 31               | -32                | -12 | 2             |
| 32               | -34                | -38 | 2             |
| 33               | 21                 | -4  | 3             |
| 34               | 20                 | -7  | 3             |
| 35               | 21                 | -10 | 2             |

|    |     |     |   |
|----|-----|-----|---|
| 36 | 16  | -26 | 3 |
| 37 | 31  | 18  | 1 |
| 38 | 23  | 8   | 2 |
| 39 | 14  | -2  | 1 |
| 40 | -1  | -23 | 3 |
| 41 | 0   | -45 | 3 |
| 42 | 18  | 44  | 2 |
| 43 | 35  | 10  | 3 |
| 44 | -40 | 22  | 1 |
| 45 | -41 | 23  | 2 |
| 46 | 20  | 9   | 2 |
| 47 | -38 | -39 | 2 |
| 48 | -1  | 50  | 2 |
| 49 | -9  | 22  | 3 |
| 50 | -24 | 26  | 3 |
| 51 | 25  | -45 | 1 |
| 52 | -23 | -33 | 2 |
| 53 | 33  | -42 | 2 |
| 54 | -27 | -23 | 3 |
| 55 | -28 | -19 | 2 |
| 56 | 39  | 27  | 1 |
| 57 | 23  | -7  | 3 |
| 58 | -44 | 14  | 1 |
| 59 | -13 | 50  | 3 |
| 60 | 46  | -22 | 1 |
| 61 | 32  | 23  | 1 |
| 62 | 8   | -38 | 3 |
| 63 | 11  | 47  | 3 |
| 64 | 10  | -4  | 2 |
| 65 | 48  | 48  | 2 |
| 66 | 48  | -1  | 1 |
| 67 | -18 | 9   | 3 |
| 68 | 47  | 31  | 2 |
| 69 | 14  | -15 | 1 |
| 70 | -38 | 12  | 1 |
| 71 | -8  | -28 | 3 |
| 72 | -50 | 5   | 3 |
| 73 | -19 | 45  | 3 |
| 74 | -10 | 46  | 1 |
| 75 | -42 | 32  | 1 |
| 76 | 41  | 38  | 1 |
| 77 | 2   | 41  | 1 |
| 78 | -8  | 43  | 1 |
| 79 | 4   | -10 | 2 |
| 80 | 9   | -43 | 2 |
| 81 | -39 | -25 | 1 |

|     |     |     |   |
|-----|-----|-----|---|
| 82  | 29  | -39 | 3 |
| 83  | 28  | 4   | 2 |
| 84  | 28  | -40 | 1 |
| 85  | 14  | -1  | 3 |
| 86  | 27  | -27 | 2 |
| 87  | 3   | 14  | 3 |
| 88  | -30 | -28 | 2 |
| 89  | -13 | -24 | 2 |
| 90  | -15 | -2  | 1 |
| 91  | -49 | 50  | 3 |
| 92  | 24  | 11  | 3 |
| 93  | -7  | 30  | 1 |
| 94  | -21 | 27  | 3 |
| 95  | 18  | -15 | 3 |
| 96  | 10  | 17  | 3 |
| 97  | -42 | 42  | 2 |
| 98  | -38 | -50 | 2 |
| 99  | -28 | 41  | 1 |
| 100 | 29  | 41  | 2 |
